# Supplementary figures and images for: Variability and Error in Measurement of Infant Formula Powder and Water: An Experimental Study
Source: Preprints.org preprint supplement (doi:10.20944/preprints202401.1825.v1), 2024-01-25

| Visual images portraying the variability in hand scooping of powdered formula | | | | | | | |
| --- | --- | --- | --- | --- | --- | --- | --- |
| 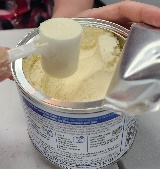 | 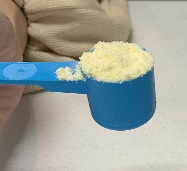 | 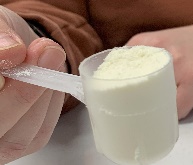 | 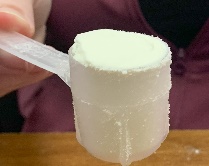 | 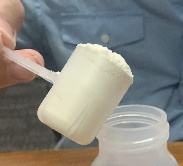 | 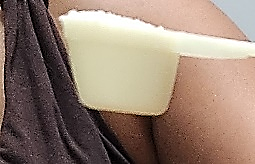 | 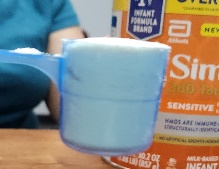 | 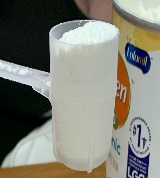 |
| 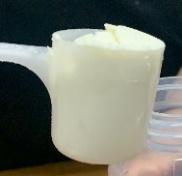 | 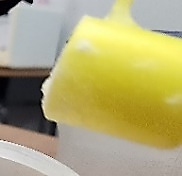 | 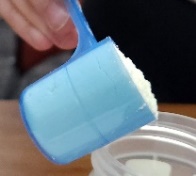 | 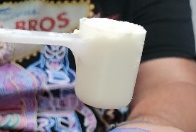 | 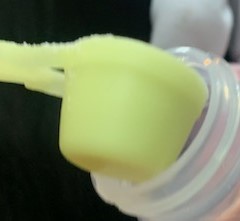 | 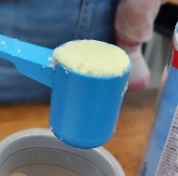 | 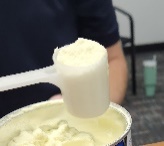 | 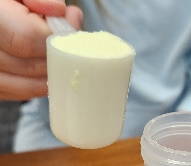 |
| 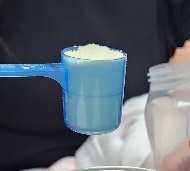 | 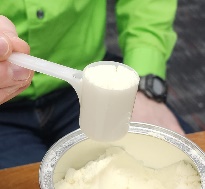 | 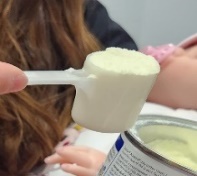 | 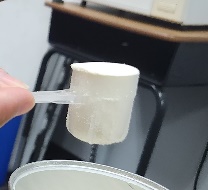 | 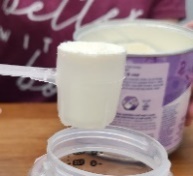 | 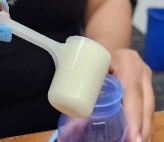 | 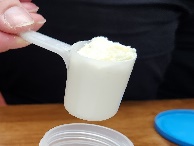 | 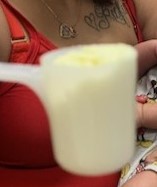 |
|  |  |  |  |  |  |  |  |
|  |  |  |  |  |  |  |  |
| 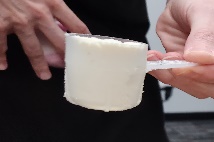 | 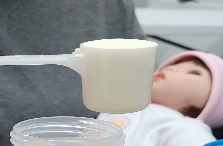 | 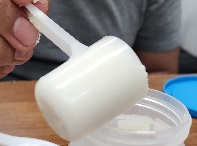 | 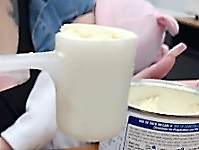 | 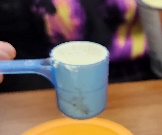 | 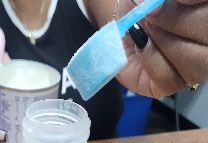 | 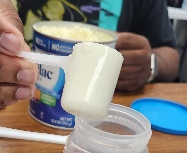 | 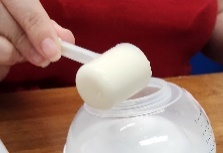 |
| 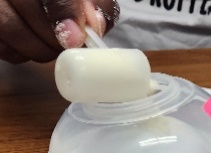 | 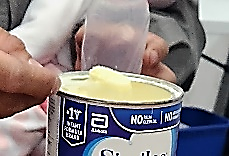 | 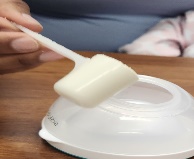 | 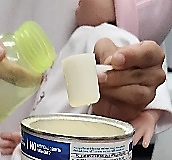 | 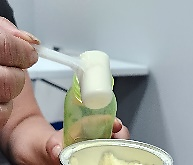 | 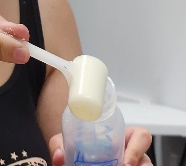 | 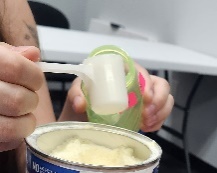 | 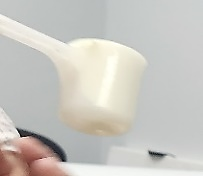 |
| 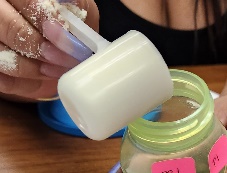 | 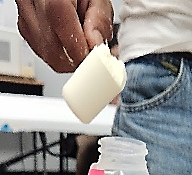 | 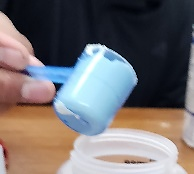 | 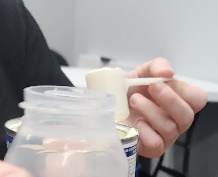 | 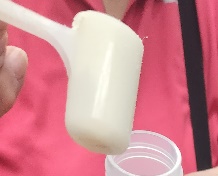 | 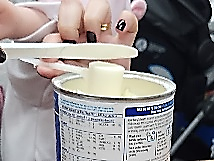 | 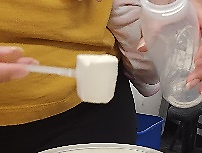 | 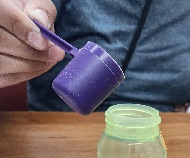 |
| 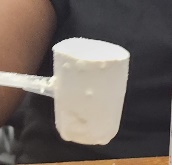 | 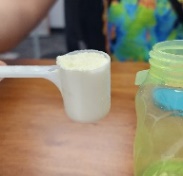 | 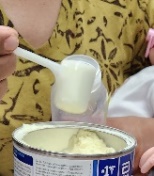 | 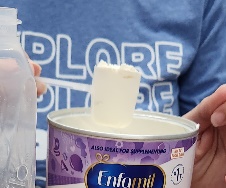 | 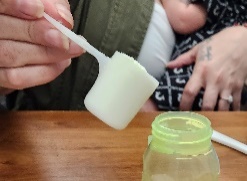 | 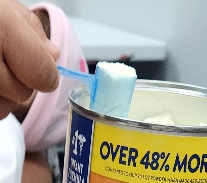 | 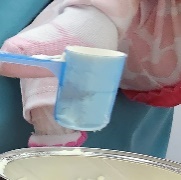 | 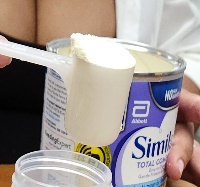 |
| 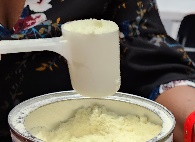 | 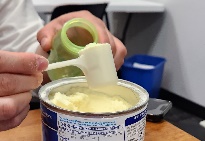 | 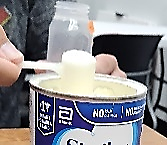 | 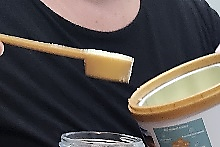 | 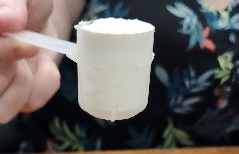 | 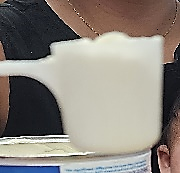 | 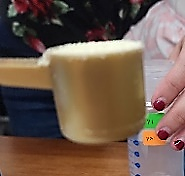 | 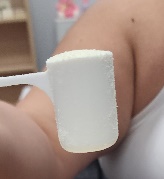 |
| 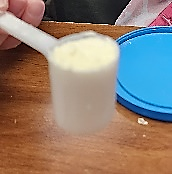 | 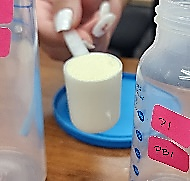 | 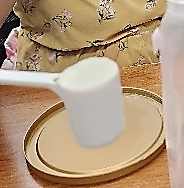 | 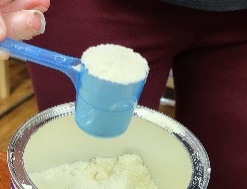 | 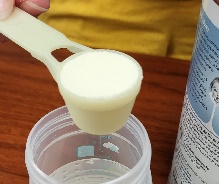 | 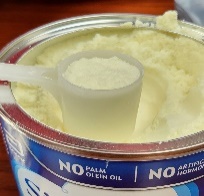 | 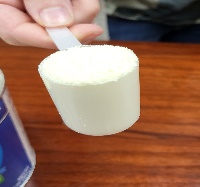 | 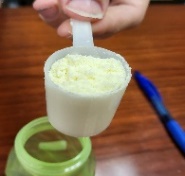 |
| 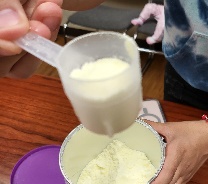 | 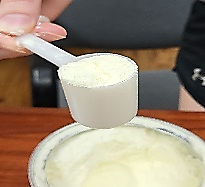 | 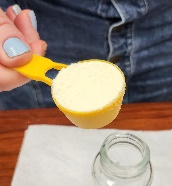 | 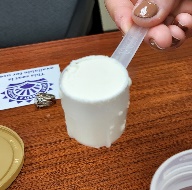 | 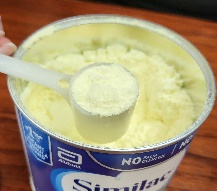 | 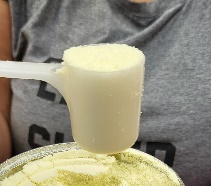 | 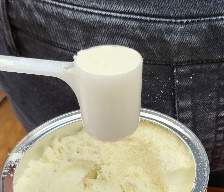 | 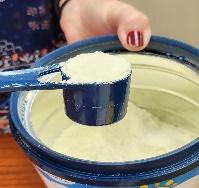 |
|  |  | 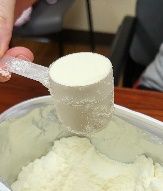 | 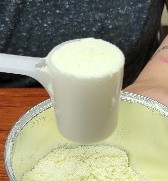 | 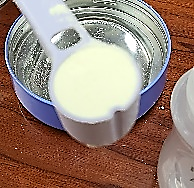 | 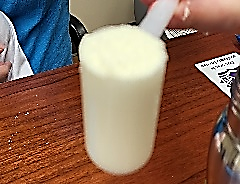 |  |  |

Supplement: Supplementary file 3 [file supplementary]
